# Supplementary material for: Reactive magnetron sputtered wear resistant multilayer transition metal carbide coatings: microstructure and tribo-mechanical properties
Source: Royal Society of Chemistry journal article supplement (doi:10.1039/c5ra16465f), 2015-01-01
Supplement: c5ra16465f1.pdf [file c5ra16465f1.pdf]

## Supporting information:

# Reactive magnetron sputtered wear resistant multilayer transition metal carbide coatings: Microstructure and tribo-mechanical properties

D. Dinesh Kumar<sup>a,b</sup>, N. Kumar<sup>c,\*</sup>, S. Kalaiselvam<sup>b</sup>, R. Radhika<sup>d</sup>, S. Dash<sup>c</sup>, A.K. Tyagi<sup>c</sup>,  
R. Jayavel<sup>a</sup>

<sup>a</sup>Centre for Nanoscience and Technology, Anna University, Chennai 600025, Tamil Nadu, India.

<sup>b</sup>Department of Applied Science and Technology, Anna University, Chennai 600025, Tamil Nadu, India.

<sup>c</sup>Materials Science Group, Indira Gandhi Centre for Atomic Research, Kalpakkam 603102, Tamil Nadu, India.

<sup>d</sup>Department of Physics, Indian Institute of Technology, Madras, Chennai , Tamil Nadu, India.

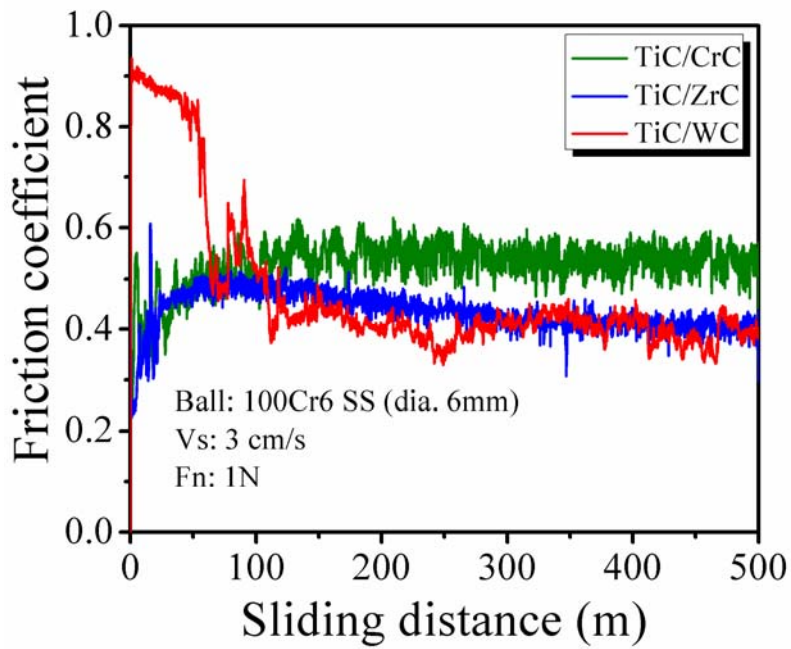

**Figure S1.** Friction coefficient curves of different TMC multilayer coatings.

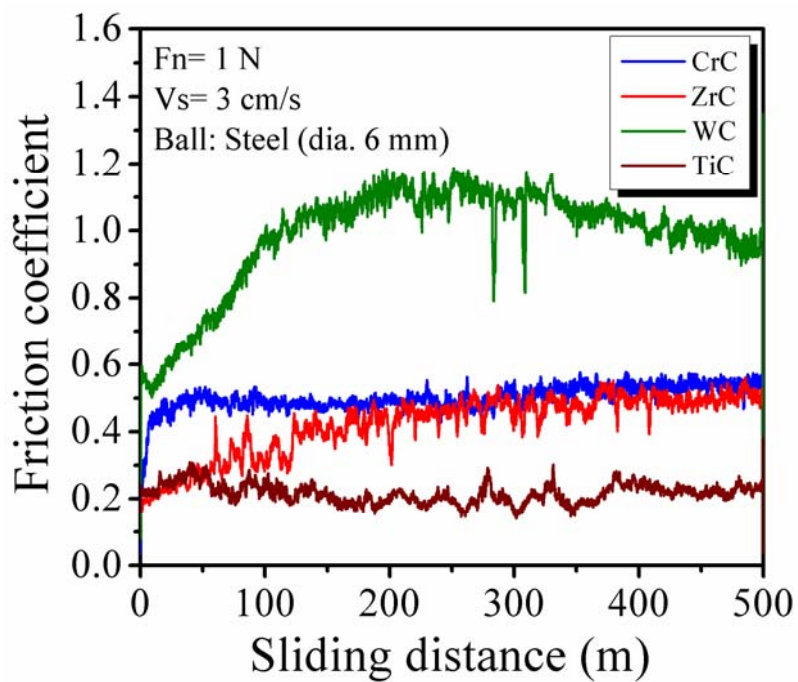

**Figure S2.** Friction coefficient curves of different TMC single layer coatings.

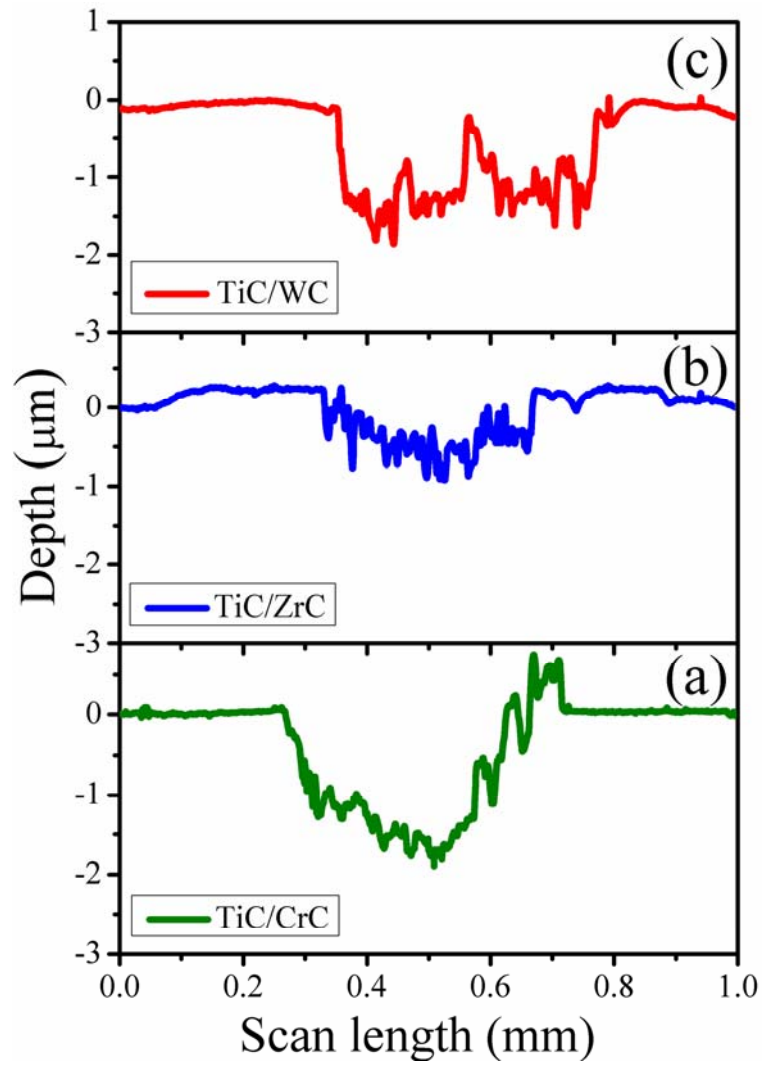

**Figure S3.** Wear profile analysis of TMC multilayer coatings on steel substrates.

(a) TiC/CrC, (b) TiC/ZrC and (c) TiC/WC.

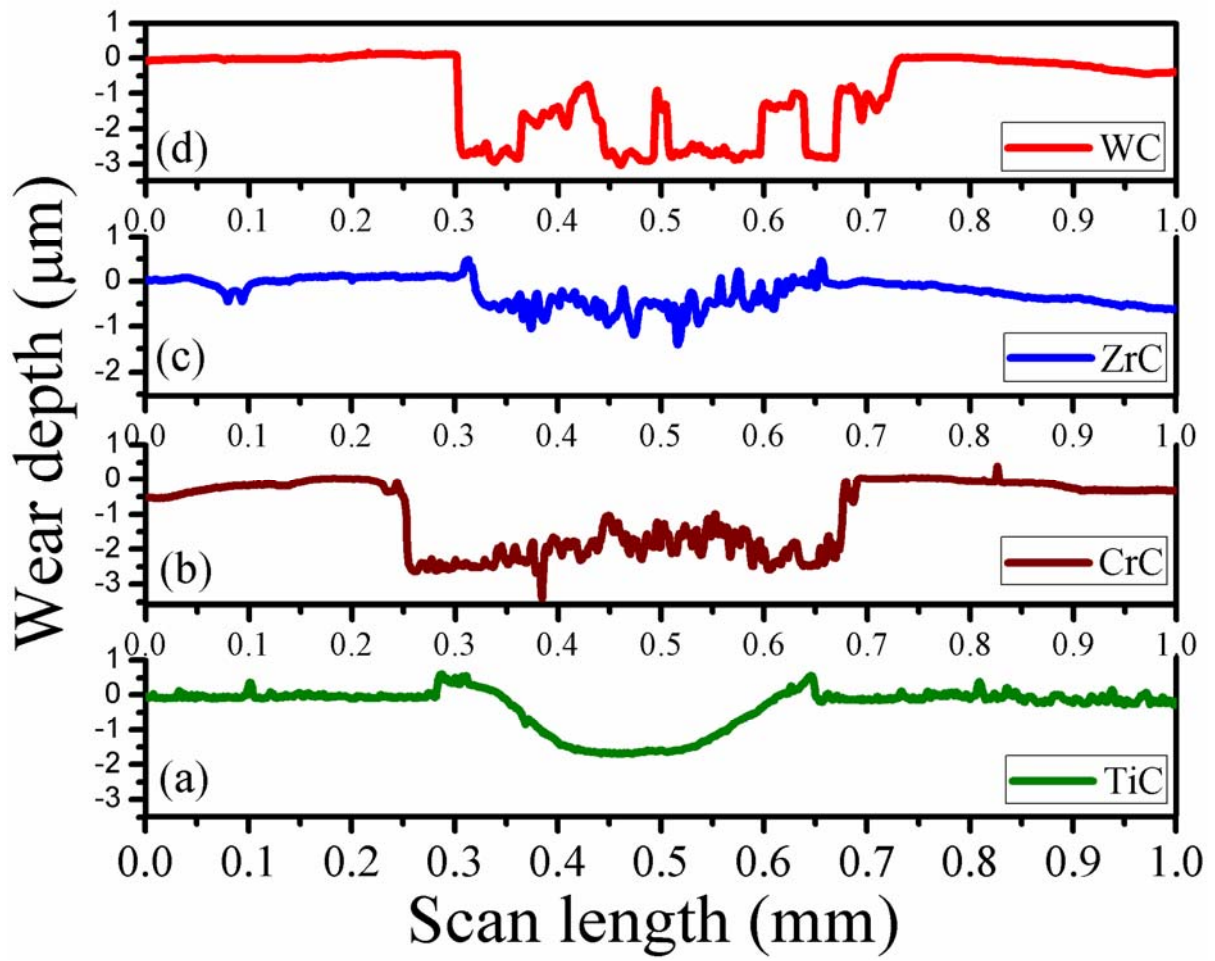

**Figure S4.** Wear profile analysis of TMC single layer coatings on steel substrates.

(a) TiC, (b) CrC and (c) ZrC and (d) WC.

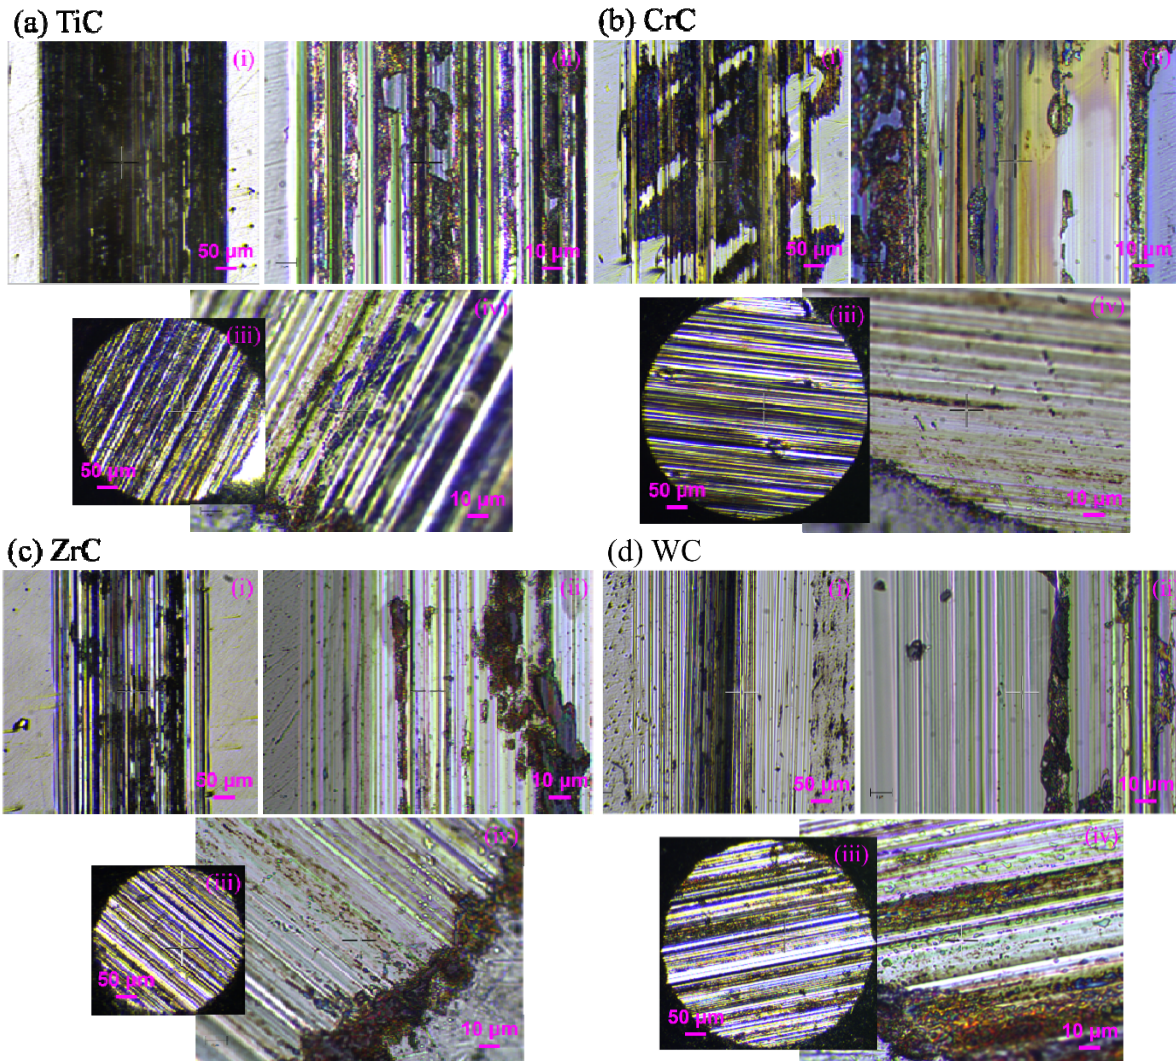

**Figure S5.** Wear micrographs on TMC coatings deposited on steel substrates. (Scar on coatings at (i) 5x & (ii) 50x and, scar on steel ball (iii) 5x & (iv) 50x magnifications).

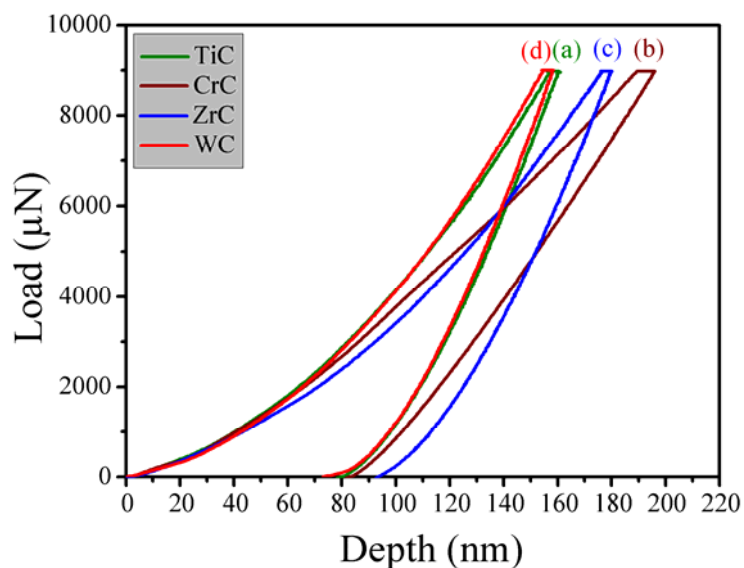

**Figure S6.** Load-displacement curves of single layer TMC coatings.

**Table S1.** Nanomechanical properties and wear rates of single layer TMC coatings on steel substrate.

| Sample  | Hardness (H)<br>(GPa) | Reduced elastic modulus<br>( $E_r$ ) (GPa) | $H^3/E^2$ (GPa)   | Wear rate (k)<br>( $\text{mm}^3/\text{Nm}$ ) |
|---------|-----------------------|--------------------------------------------|-------------------|----------------------------------------------|
| (a) TiC | $18.05 \pm 1$         | $208.08 \pm 15$                            | $0.135 \pm 0.010$ | $4.89 \times 10^{-5}$                        |
| (b) CrC | $7.60 \pm 2.2$        | $138.20 \pm 19$                            | $0.022 \pm 0.007$ | $1.60 \times 10^{-3}$                        |
| (c) ZrC | $16.70 \pm 1$         | $187.50 \pm 10$                            | $0.132 \pm 0.020$ | $2.79 \times 10^{-8}$                        |
| (d) WC  | $23.90 \pm 2$         | $250.03 \pm 24$                            | $0.218 \pm 0.030$ | $8.15 \times 10^{-4}$                        |

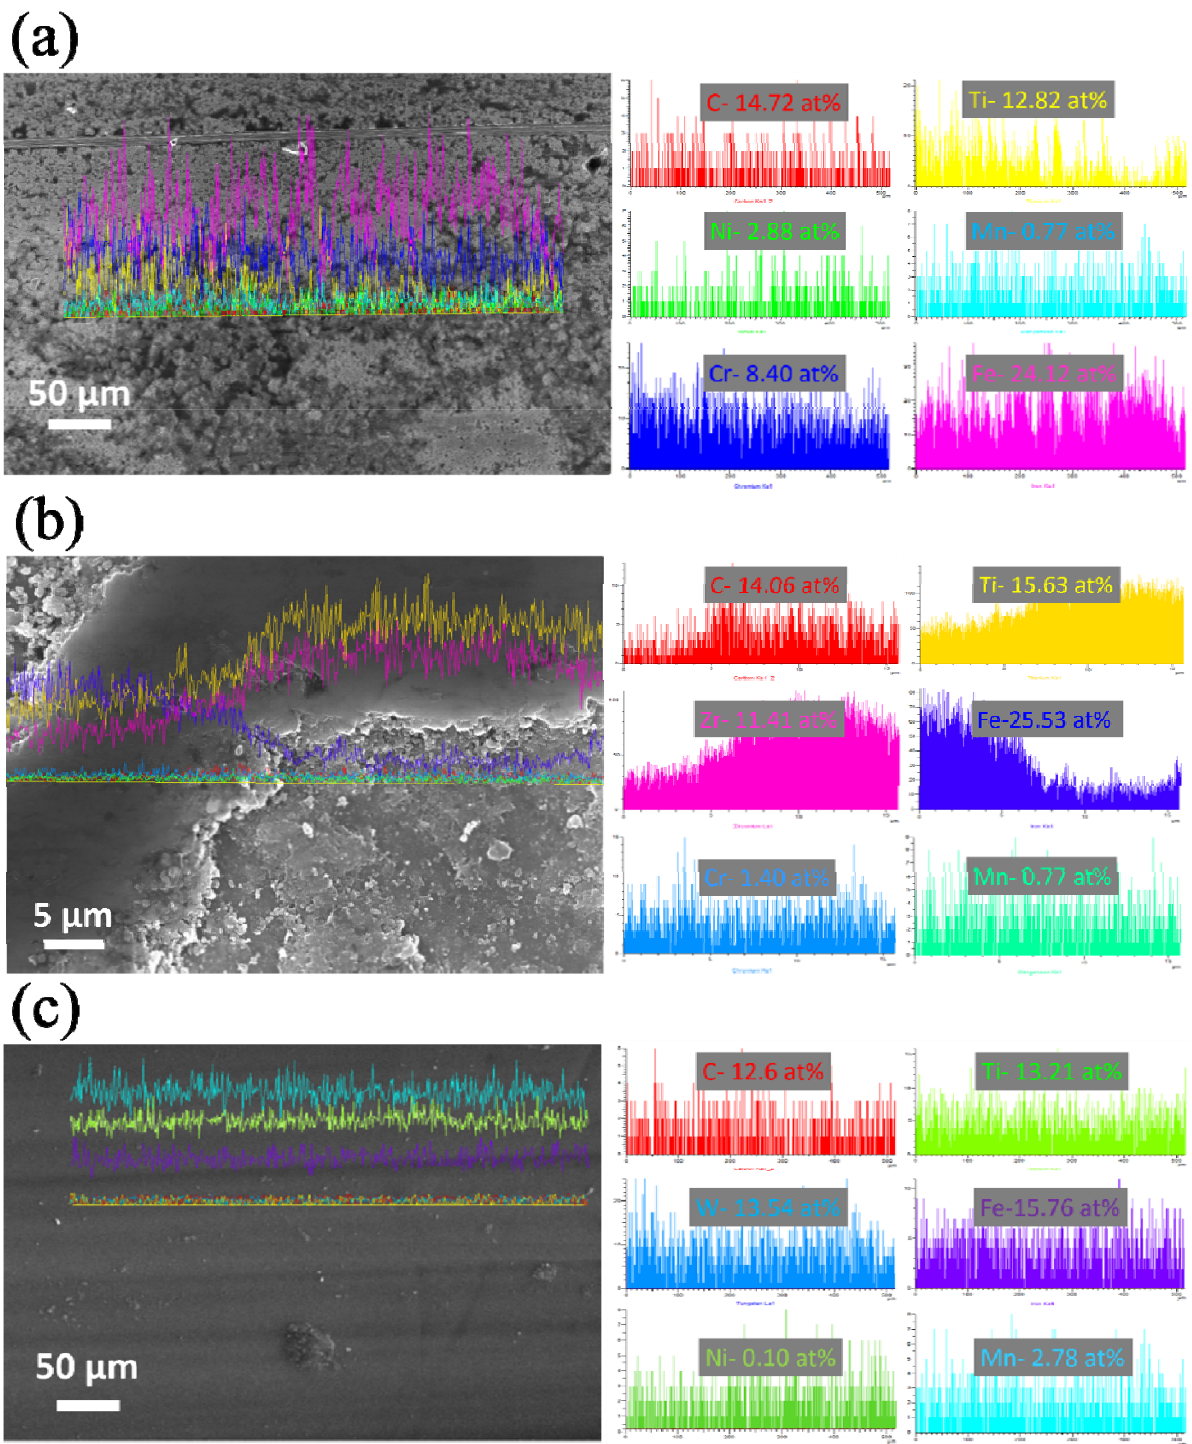

**Figure S7.** EDAX elemental profile analysis inside the wear track of (a) TiC/CrC, (b) TiC/ZrC and (c) TiC/WC multilayer coatings.
